# Supplementary material for: Component-controlled synthesis of PdxSny nanocrystals on carbon nanotubes as advanced electrocatalysts for oxygen reduction reaction
Source: Royal Society of Chemistry journal article supplement (doi:10.1039/d3ra07657a), 2024-01-01
Supplement: d3ra07657a1.pdf [file d3ra07657a1.pdf]

## Supporting Information

### Component-Controlled Synthesis of Pd<sub>x</sub>Sn<sub>y</sub> Nanocrystals on Carbon Nanotubes as Advanced Electrocatalysts for Oxygen Reduction Reaction

Weibin Guo,<sup>a</sup> Rui Yang,<sup>bc</sup> Jiayao Fan,<sup>b</sup> Xing Xiang,<sup>a</sup> Xuehui Du,<sup>a</sup> Naien Shi,<sup>\*ac</sup>

Jianchun Bao,<sup>b</sup> and Min Han<sup>\*ab</sup>

<sup>a</sup> Fujian Cross Strait Institute of Flexible Electronics (Future Technologies), Fujian Normal University, Fuzhou 350117, P. R. China

<sup>b</sup> Jiangsu Key Laboratory of New Power Batteries, and Jiangsu Key Laboratory of Biofunctional Materials, School of Chemistry and Materials Science, Nanjing Normal University, Nanjing 210023, P. R. China

<sup>c</sup> Key Laboratory for Organic Electronics and Information Displays, Institute of Advanced Materials, Nanjing University of Posts & Telecommunications, Nanjing 210023, P. R. China

**E-mail:** ifeneshi@fjnu.edu.cn (N. Shi); 07203@njnu.edu.cn (M. Han)

## Additional Experimental Sections

### 1. Koutecky-Levich (K-L) plots.

The related ORR polarization curves of Pd<sub>3</sub>Sn/CNTs NHs at the rotating rate of 400, 800, 1200, 1600, and 2500 rpm were obtained. Based on those polarization curves, the electron transfer number (*n*) per oxygen molecule involved in the ORR process was calculated according to the Koutecky-Levich (K-L) equation as follows:

$$\frac{1}{J} = \frac{1}{J_K} + \frac{1}{B\omega^{0.5}} \quad (1)$$

Where *J* is the current density, *J<sub>k</sub>* is the kinetic current density, *ω* is the rotating rate of the electrode, and *B* could be obtained from the K-L plots using the equation (1). The electron transfer number (*n*) per oxygen molecule involved in the ORR process could be calculated from the slope (*B*) of the linear plot and the following relationship:

$$B = 0.62nF(D_{O_2})^{2/3}v^{-1/6}C_{O_2} \quad (2)$$

*F* in equation (2) is the Faraday constant (96485 C mol<sup>-1</sup>), *D<sub>O<sub>2</sub></sub>* is the diffusion coefficient of O<sub>2</sub> in 0.1 M KOH (1.9 × 10<sup>-5</sup> cm<sup>2</sup> s<sup>-1</sup>), *v* is the kinetic viscosity (0.01 cm<sup>2</sup> s<sup>-1</sup>), *C<sub>O<sub>2</sub></sub>* is the bulk concentration of O<sub>2</sub> (1.2 × 10<sup>-6</sup> mol cm<sup>-3</sup>), and the value of *n* represents the number of transferred electrons in the ORR process.

### 2. Rotating ring-disk electrode (RRDE) measurements.

The rotating speed of the working electrode was fixed at 1600 rpm with the scan rate of 5 mV s<sup>-1</sup> in O<sub>2</sub>-saturated 0.1 M KOH solution for the RRDE test. The HO<sub>2</sub><sup>-</sup> % and the electron transfer number (*n*) involved in the ORR process were determined by the following equations:

$$HO_2^- \% = 200(I_r/N)/(I_d + I_r/N) \quad (3)$$

$$n = 4I_d/(I_d + I_r/N) \quad (4)$$

Where  $I_d$  is the disk current,  $I_r$  is the ring current, and N is the current collection efficiency of the Pt ring, which is identified to be 0.43 in 2 mmol L<sup>-1</sup> K<sub>3</sub>[Fe(CN)<sub>6</sub>] and 0.1 mol L<sup>-1</sup> KCl solution.

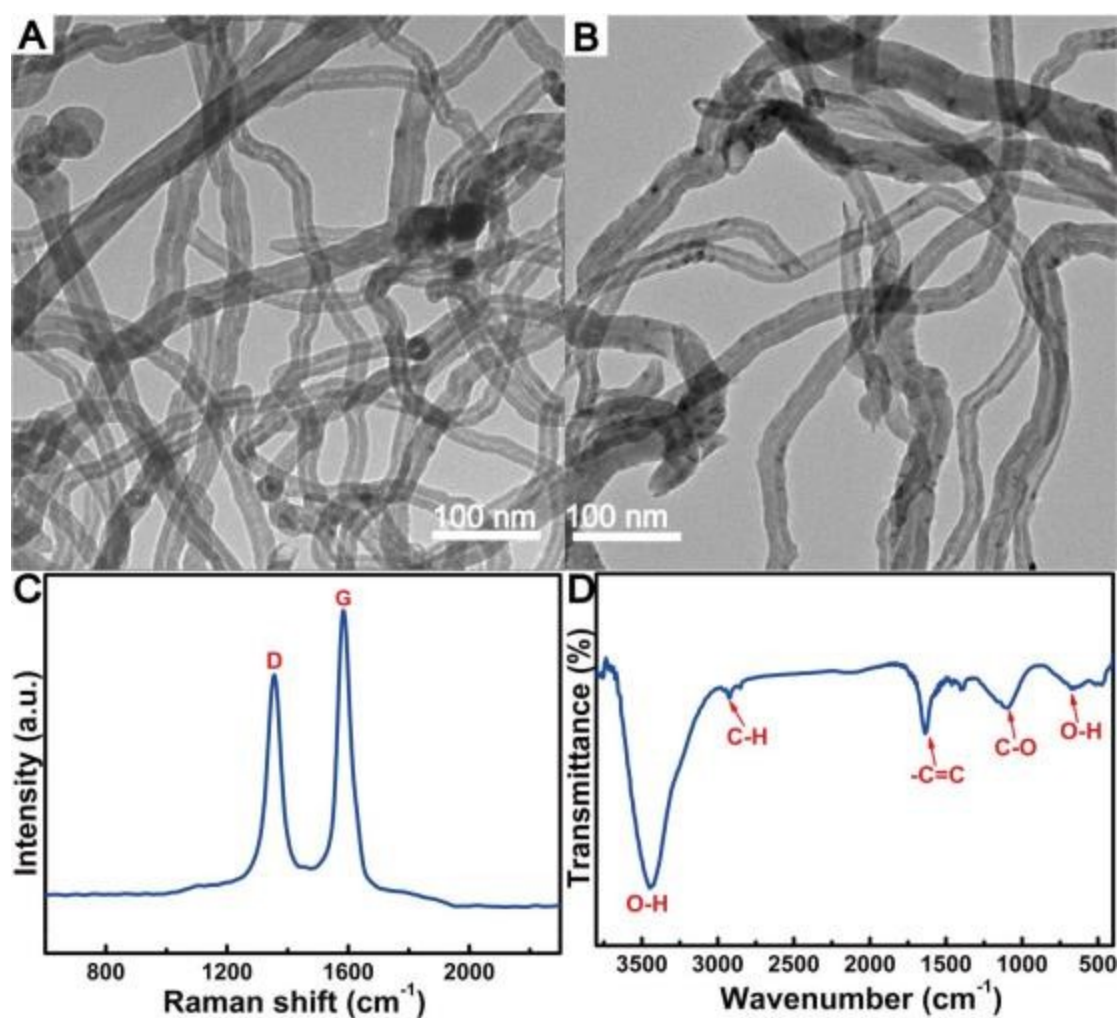

**Fig. S1** A-B) TEM images of the carbon nanotubes (CNTs) before (A) and after (B) acidic treatment. C-D) Raman (C) and FT-IR (D) spectra of the CNTs after acidic treatment.

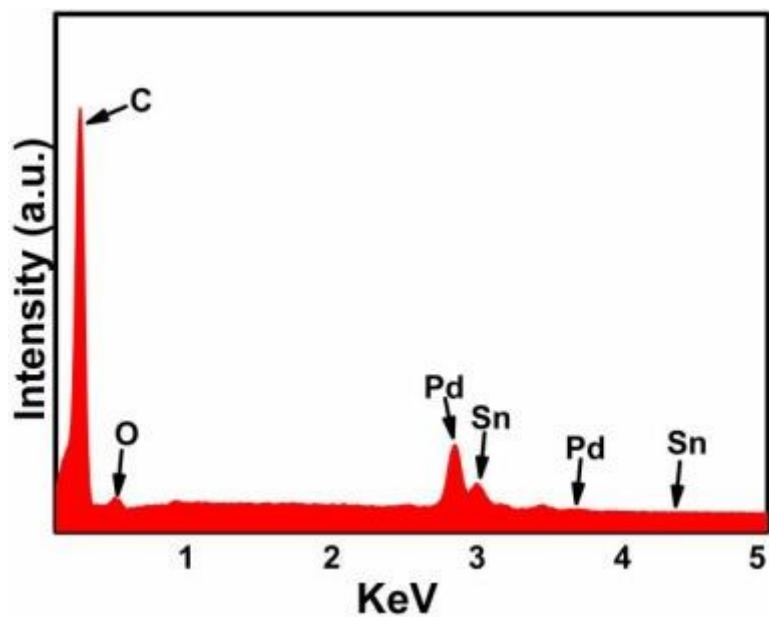

**Fig. S2** The EDS pattern for the typical Pd<sub>3</sub>Sn/CNTs NHs.

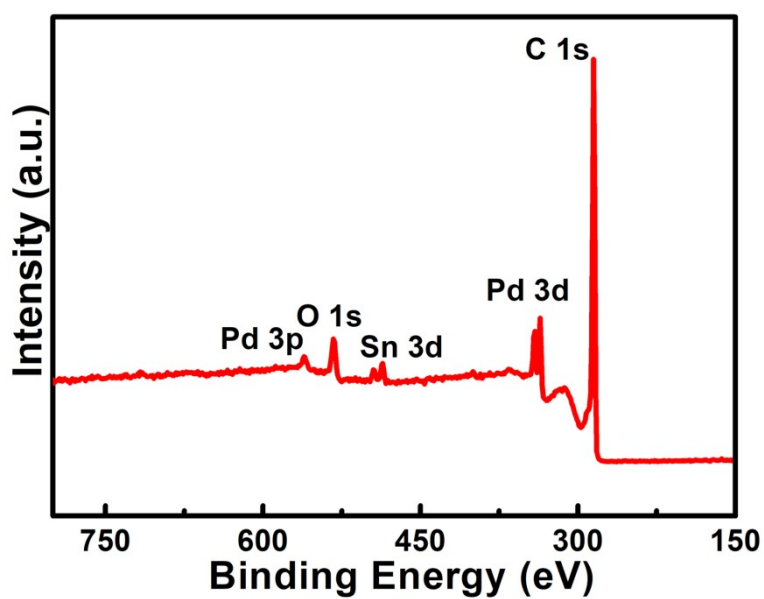

**Fig. S3** The survey XPS spectra for the typical Pd<sub>3</sub>Sn/CNTs NHs.

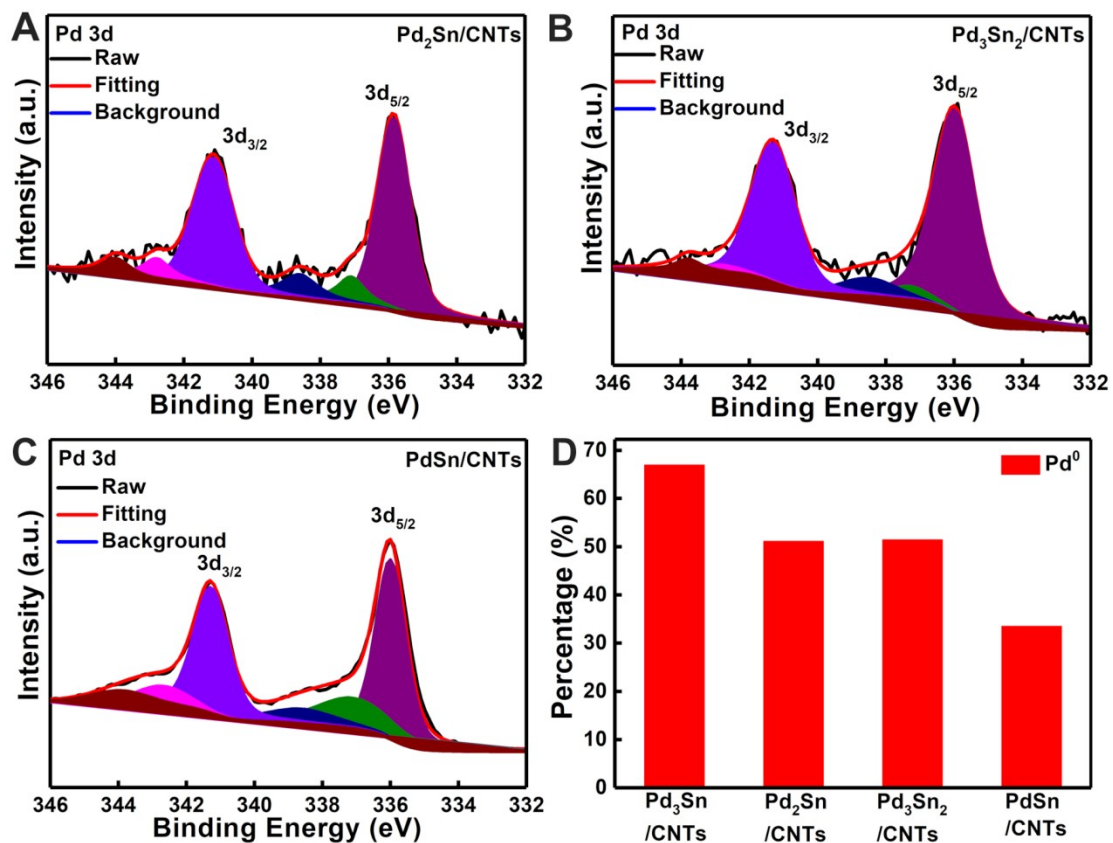

**Fig. S4** A-C) Pd 3d fine XPS spectra for the Pd<sub>2</sub>Sn/CNTs NHs (A), Pd<sub>3</sub>Sn<sub>2</sub>/CNTs NHs (B) and PdSn/CNTs NHs (C). D) The percentage of Pd<sup>0</sup> for the Pd<sub>3</sub>Sn/CNTs NHs, Pd<sub>2</sub>Sn/CNTs NHs, Pd<sub>3</sub>Sn<sub>2</sub>/CNTs NHs, and PdSn/CNT NHs.

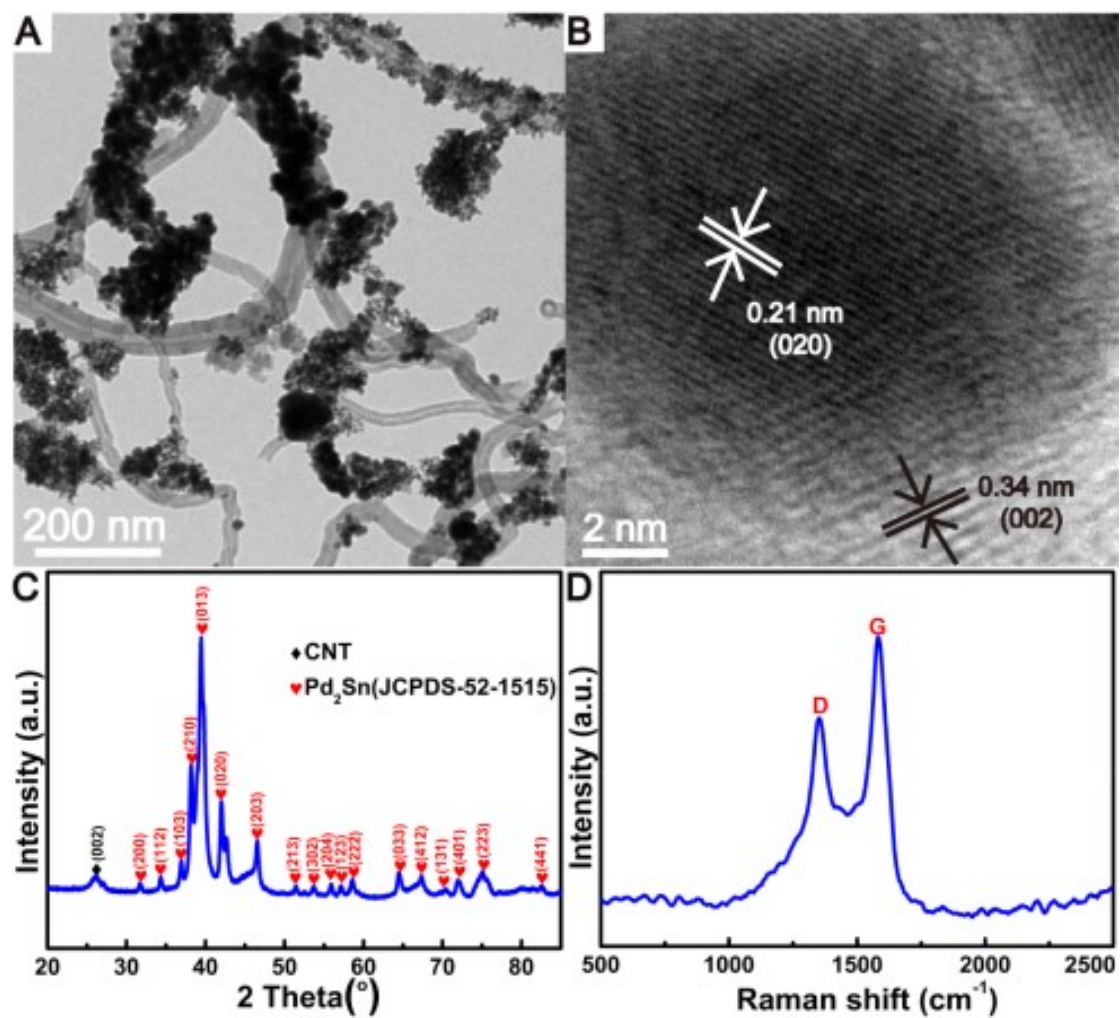

**Fig. S5** A-B) TEM image (A) and HRTEM image (B) of Pd<sub>2</sub>Sn/CNTs NHs. C-D) The corresponding XRD pattern (C) and Raman spectra (D) for Pd<sub>2</sub>Sn/CNTs NHs.

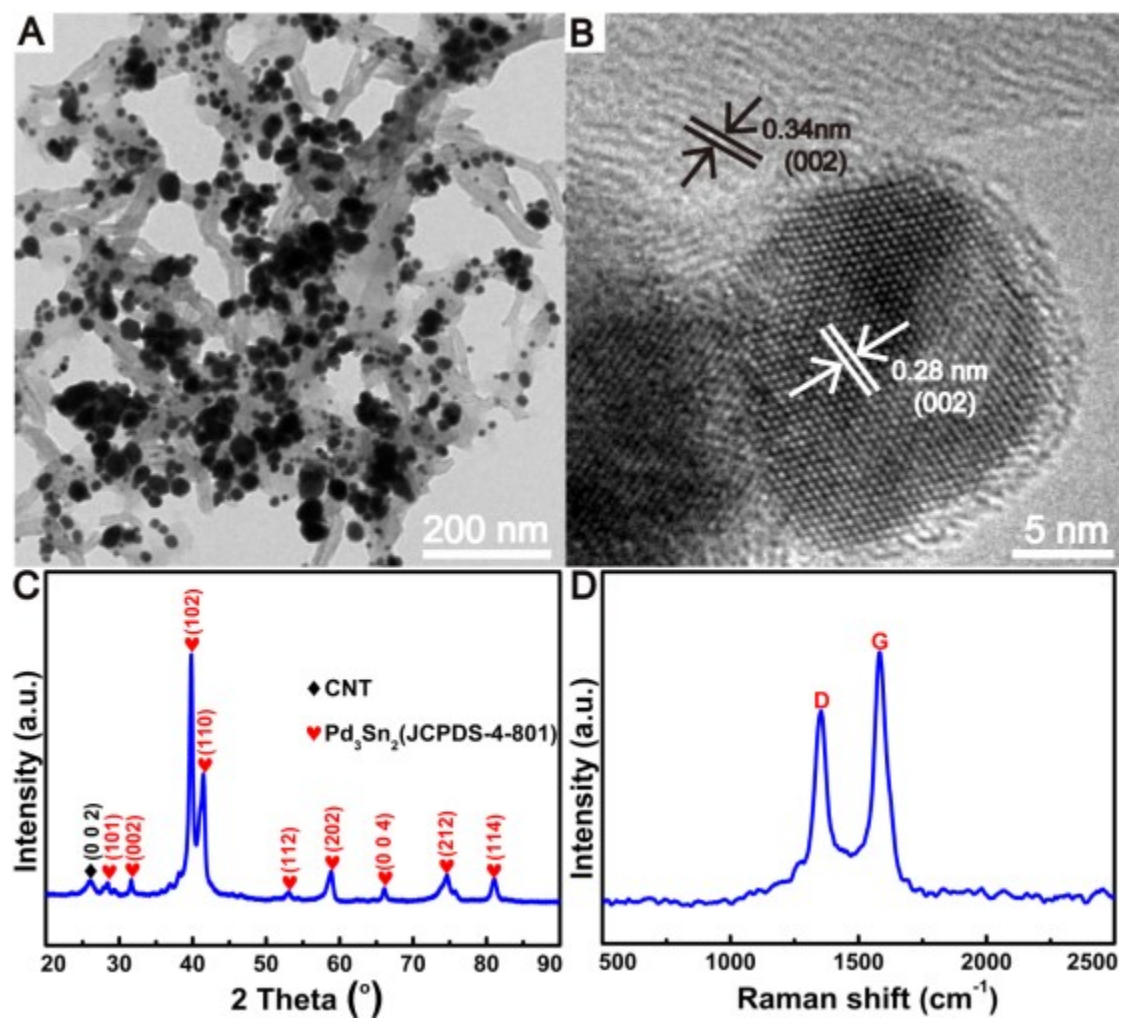

**Fig. S6** A-B) TEM image (A) and HRTEM image (B) of Pd<sub>3</sub>Sn<sub>2</sub>/CNTs NHs. C-D) The related XRD pattern (C) and Raman spectra (D) for Pd<sub>3</sub>Sn<sub>2</sub>/CNTs NHs.

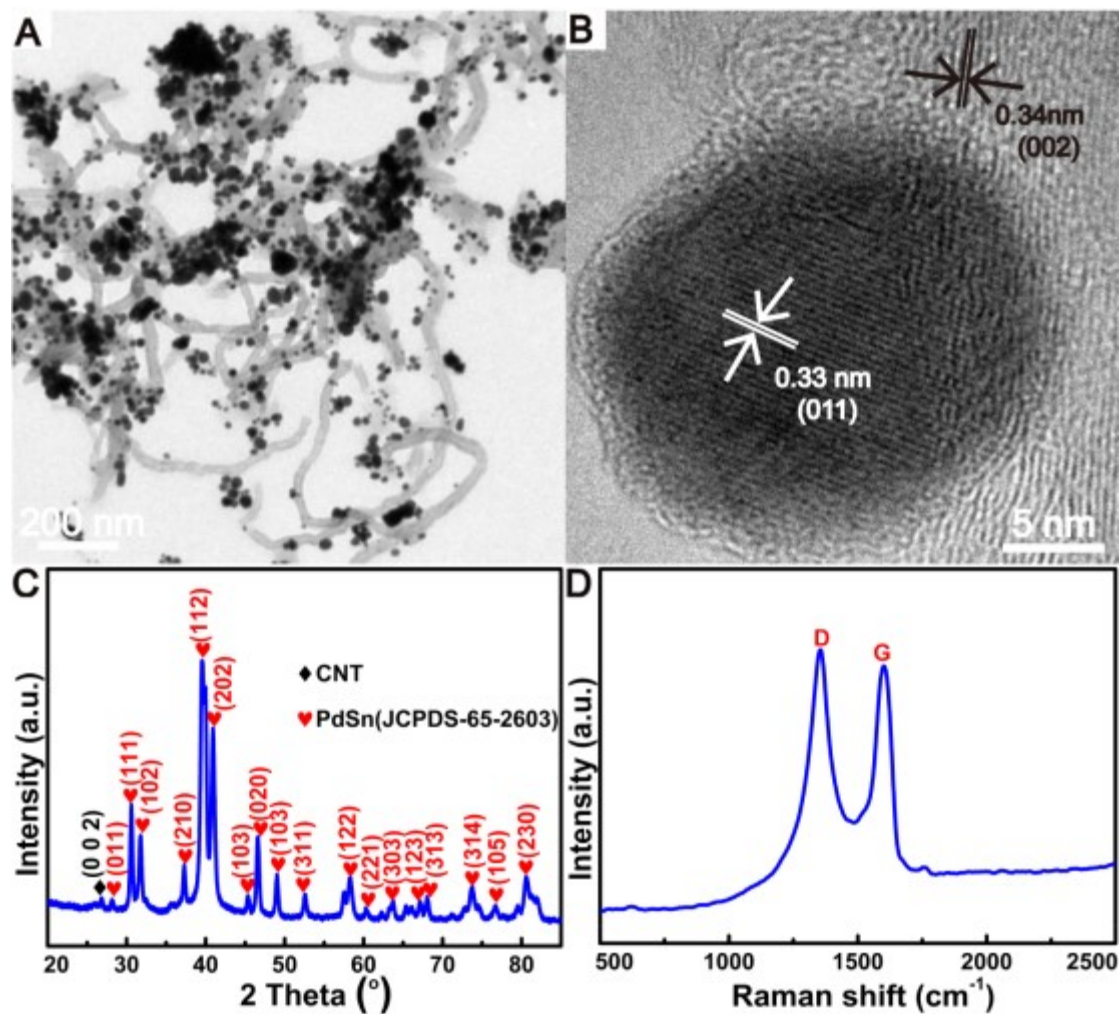

**Fig. S7** A-B) TEM image (A) and HRTEM image (B) of PdSn/CNTs NHs. C-D) The related XRD pattern (C) and Raman spectra (D) for PdSn/CNTs NHs.

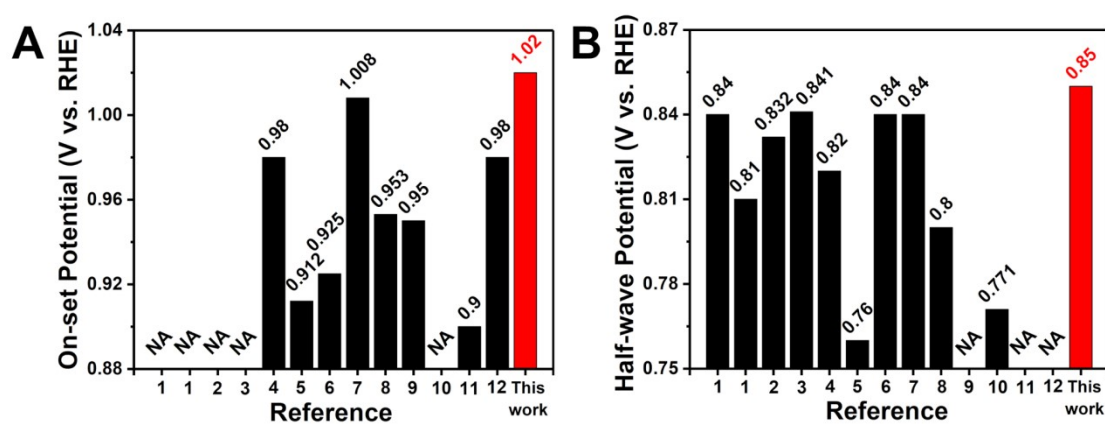

**Fig. S8** A-B) The on-set potential (A) and half-wave potential (B) of Pd<sub>3</sub>Sn/CNTs NHs and recently reported Pd-based alloys and multimetallic catalysts<sup>1-12</sup>.



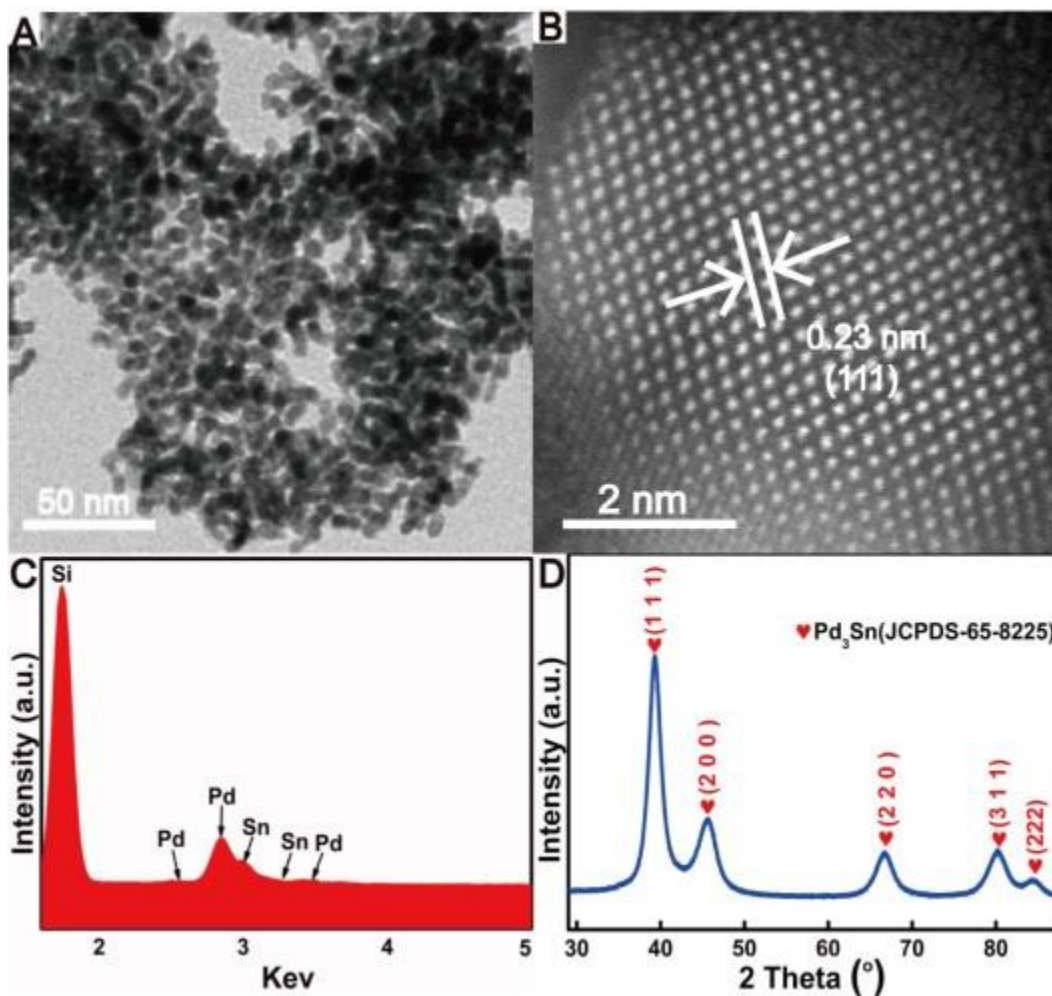

**Fig. S9** A-B) TEM image (A) and HRTEM image (B) of pure Pd<sub>3</sub>Sn NCs. C-D) The corresponding EDS spectra (C) and XRD pattern (D) for pure Pd<sub>3</sub>Sn NCs.

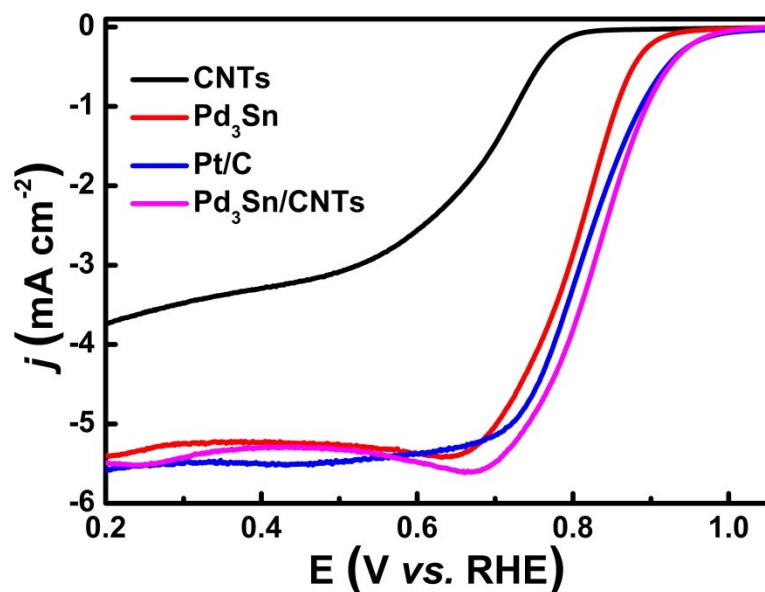

**Fig. S10** ORR polarization plots of pure CNTs, pure Pd<sub>3</sub>Sn NCs, commercial Pt/C, and Pd<sub>3</sub>Sn/CNTs NHs in O<sub>2</sub>-saturated 0.1 M KOH electrolyte at the electrode rotation rate of 1600 rpm.

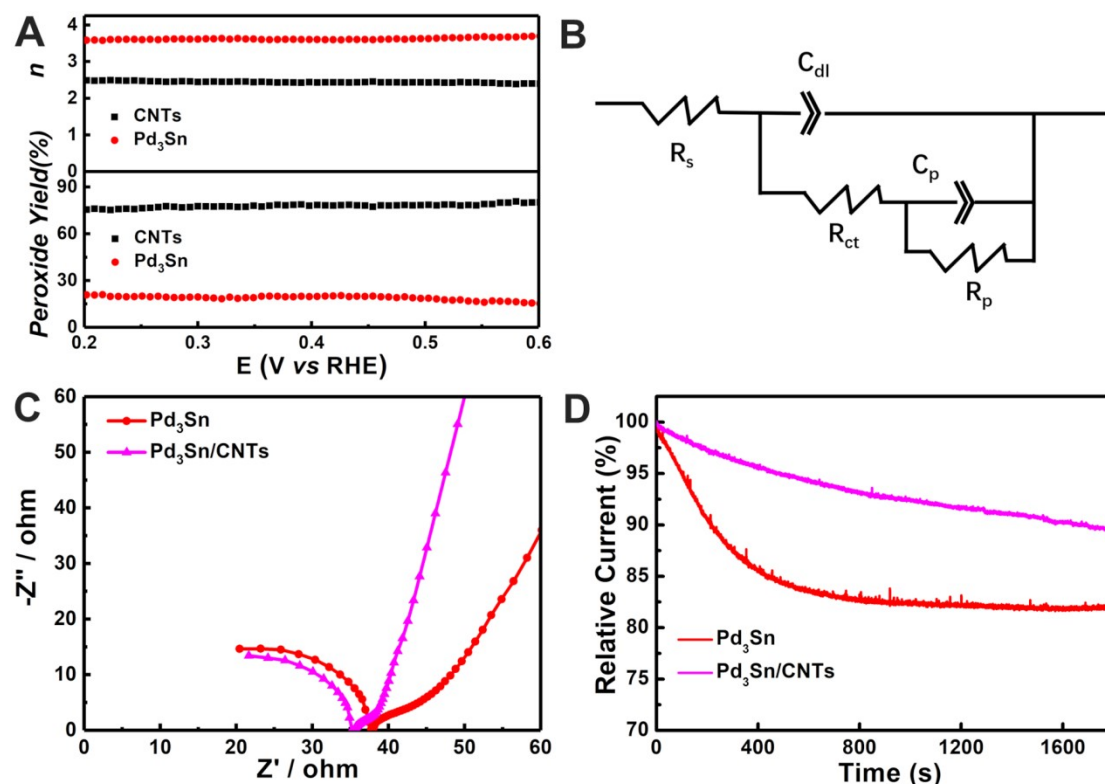

**Fig. S11** A) The peroxide species yield and the number of transferred electrons ( $n$ ) for pure CNTs and pure Pd<sub>3</sub>Sn NCs. B) The equivalent circuit model. C-D) Nyquist plots

(C) and i-t plots (D) for pure Pd<sub>3</sub>Sn NCs and Pd<sub>3</sub>Sn/CNTs NHs.

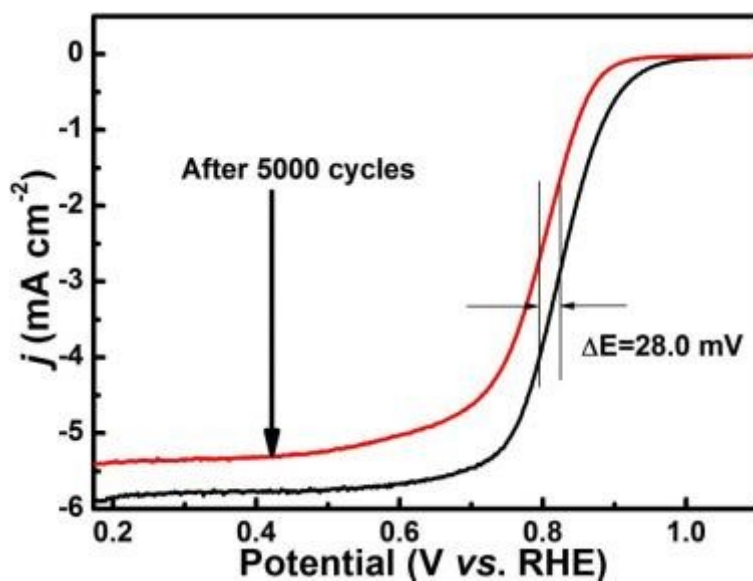

Fig. S12 The durability test plots for the commercial Pt/C catalyst.

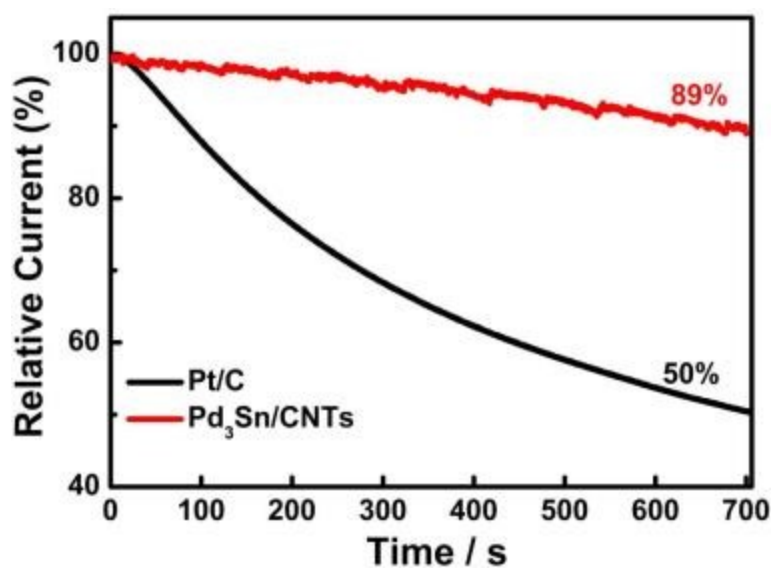

Fig. S13 Durability evaluation of the typical Pd<sub>3</sub>Sn/CNTs NHs and Pt/C catalyst in O<sub>2</sub>-saturated 0.1 M KOH + 1 M CH<sub>3</sub>OH solution at a constant potential of 0.7 V (vs. RHE) for 700s with the electrode rotation rate of 1600 rpm.

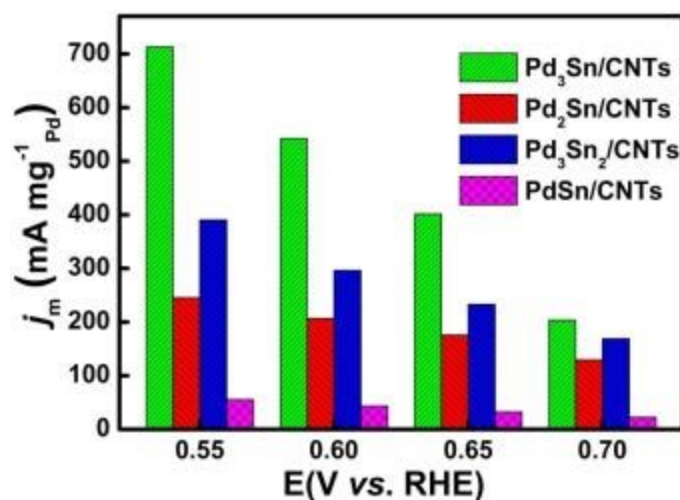

**Fig. S14** Mass-specific activities of Pd<sub>x</sub>Sn<sub>y</sub>/CNTs NHs catalysts at the potential of 0.55, 0.60, 0.65, and 0.70V (vs. RHE) according to the mass of pure Pd in the NHs.

**Table S1.** Comparison of catalytic performance parameters of Pd<sub>3</sub>Sn/CNTs NHs in this work with recently reported Pd-based alloys and multimetallic catalysts.

| Pd-based nanocatalysts                            | Electrolyte | On-set Potential (V vs. RHE) | Half-wave Potential (V vs. RHE) | References                                                              |
|---------------------------------------------------|-------------|------------------------------|---------------------------------|-------------------------------------------------------------------------|
| PbPd/C_Pre <sup>1</sup>                           | 0.1 M KOH   | NA                           | 0.84                            | <i>J. Electroanal. Chem.</i> <b>2022</b> , <i>917</i> , 116391.         |
| SnPd/C_300 <sup>1</sup>                           | 0.1 M KOH   | NA                           | 0.81                            | <i>J. Colloid Interface Sci.</i> <b>2021</b> , <i>602</i> , 159-167.    |
| Pd/SnO <sub>2</sub> <sup>2</sup>                  | 0.1 M KOH   | NA                           | 0.832                           | <i>Dalton Trans.</i> <b>2020</b> , <i>49</i> , 1398-1402.               |
| Pd/Nb <sub>2</sub> O <sub>5</sub> <sup>3</sup>    | 0.1 M KOH   | NA                           | 0.841                           | <i>J. Catal.</i> <b>2020</b> , <i>382</i> , 181-191.                    |
| Pd@Zn_Core-shell <sup>4</sup>                     | 0.1 M KOH   | 0.98                         | 0.82                            | <i>Int. J. Hydrogen Energy</i> <b>2018</b> , <i>43</i> , 5690-5702.     |
| N-rGO-Pd <sup>5</sup>                             | 0.1 M KOH   | 0.912                        | 0.76                            | <i>Int. J. Hydrogen Energy</i> <b>2018</b> , <i>43</i> , 229-238.       |
| Pd nanonetworks <sup>6</sup>                      | 0.1 M KOH   | 0.925                        | 0.84                            | <i>J. Electroanal. Chem.</i> <b>2018</b> , <i>827</i> , 120-127.        |
| Ir <sub>27</sub> Pd <sub>73</sub> /C <sup>7</sup> | 0.1 M NaOH  | 1.008                        | 0.84                            | <i>ACS Appl. Mater. Interfaces</i> <b>2018</b> , <i>10</i> , 8155-8164. |
| MnPd <sub>3</sub> /C <sup>8</sup>                 | 0.1 M KOH   | 0.953                        | 0.80                            | <i>Appl. Catal., B</i> <b>2018</b> , <i>241</i> , 424-429.              |
| Pd <sub>2</sub> CoAg <sup>9</sup>                 | 0.1 M KOH   | 0.95                         | NA                              | <i>ChemSusChem</i> <b>2017</b> ,                                        |
| PdAuCu <sup>10</sup>                              | 0.1 M KOH   | NA                           | 0.771                           |                                                                         |

|                                                   |                  |             |             |                                                                              |
|---------------------------------------------------|------------------|-------------|-------------|------------------------------------------------------------------------------|
| Pd-g-C <sub>3</sub> N <sub>4</sub> <sup>11</sup>  | 0.1 M KOH        | 0.90        | NA          | 10, 1469-1474<br><i>J. Phys. Chem. C</i> <b>2016</b> ,<br>120, 14467 -14473. |
| Pd <sub>3</sub> Pb/TiO <sub>2</sub> <sup>12</sup> | 0.1 M KOH        | 0.98        | NA          | <i>J. Appl. Electrochem.</i><br><b>2016</b> , 46, 745-753.                   |
| <b>Pd<sub>3</sub>Sn/CNTs NHs</b>                  | <b>0.1 M KOH</b> | <b>1.02</b> | <b>0.85</b> | <b>This work</b>                                                             |

## References:

- 1 M. Lüsi, H. Erikson, H.-M. Piirsoo, P. Paiste, J. Aruväli, A. Kikas, V. Kisand, A. Tamm, K. Tammeveski, *J. Electroanal. Chem.*, 2022, 917, 116391.
- 2 G. Chao, L. Zhang, T. Xue, J. Tian, W. Fan, T. Liu, *J. Colloid Interface Sci.*, 2021, 602, 159-167.
- 3 C. Huang, W. Dong, C. Dong, X. Wang, B. Jia, F. Huang, *Dalton Trans.*, 2020, 49, 1398-1402.
- 4 H. Yang, K. Wang, Z. Tang, Z. Liu, S. Chen, *J. Catal.*, 2020, 382, 181-191.
- 5 A. Ejaz, S. Jeon, *Int. J. Hydrogen Energy*, 2018, 43, 5690-5702.
- 6 H. Begum, M. S. Ahmed, S. Cho, S. Jeon, *Int. J. Hydrogen Energy*, 2018, 43, 229-238.
- 7 A. T. N. Nguyen, J. H. Shim, *J. Electroanal. Chem.*, 2018, 827, 120-127.
- 8 Y. Lu, S. Zhao, R. Yang, D. Xu, J. Yang, Y. Lin, N.-E. Shi, Z. Dai, J. Bao, M. Han, *ACS Appl. Mater. Interfaces*, 2018, 10, 8155-8164.
- 9 S. Liu, H. Zhang, X. Mu, C. Chen, *Appl. Catal., B*, 2019, 241, 424-429.
- 10 H. Gong, X. Cao, F. Li, Y. Gong, L. Gu, R. G. Mendes, M. H. Rummeli, P. Strasser, R. Yang, *ChemSusChem*, 2017, 10, 1469-1474.
- 11 S. K. Konda, M. Amiri, A. Chen, *J. Phys. Chem. C*, 2016, 120, 14467-14473.
- 12 A. J. Jeevagan, T. Gunji, F. Ando, T. Tanabe, S. Kaneko, F. Matsumoto, *J. Appl. Electrochem.*, 2016, 46, 745-753.
